# Supplementary material
Source: PubMed Central journal article supplement (PMC1785264)

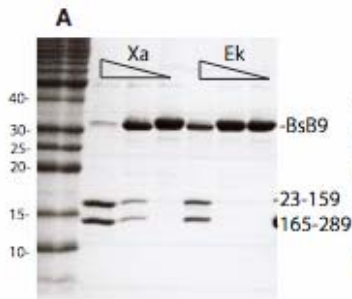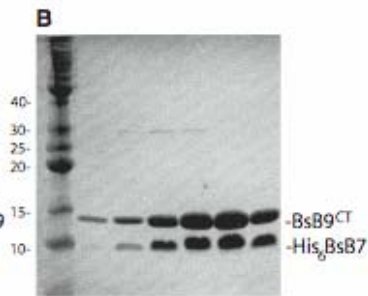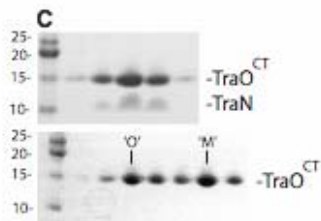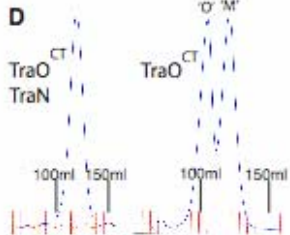

Supplement: pnas_0609535104_1.pdf [file pnas_0609535104_1.pdf]

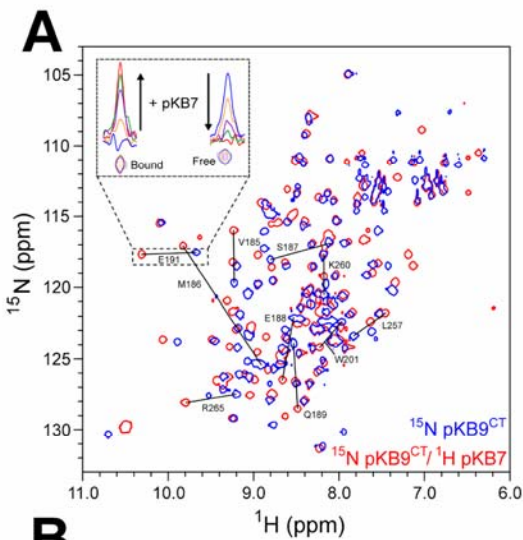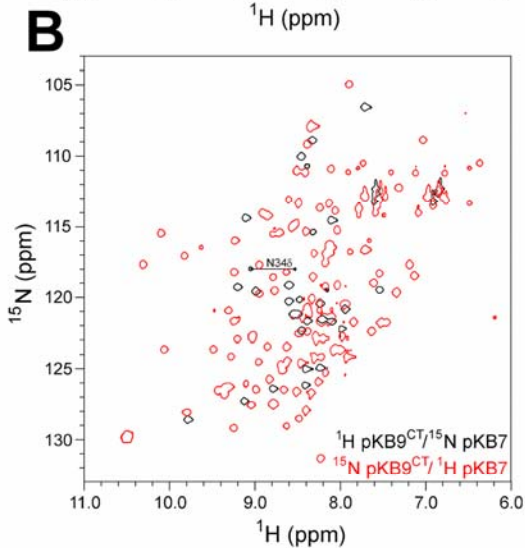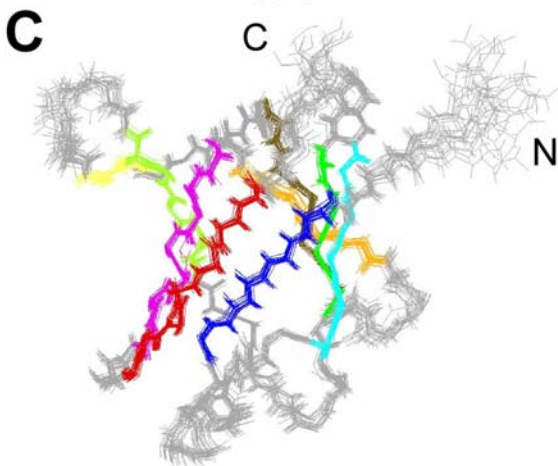

Supplement: pnas_0609535104_2.pdf [file pnas_0609535104_2.pdf]

$\alpha$ -B9

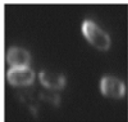

$\Delta$ B9(B9)

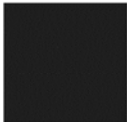

$\Delta$ B9

IFM

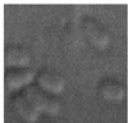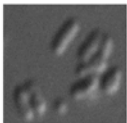

DIC

Supplement: pnas_0609535104_3.pdf [file pnas_0609535104_3.pdf]
